# Supplementary material
Source: Research Square preprint supplement (doi:10.21203/rs.3.rs-8910521/v1)
Supplement: Supplementary file 1 [file 27fb4c8d6649cf540ba07b41.xlsx]

## Sheet: Sheet1
Supplementary Table 2: The detailed list of antibodies used in the study.
Primary antibodies
	Target protein	Company	Host	Catalogue	Clone	Lot	Application	Dilution
	KLF3	abcam	Rabbit	ab154531	Polyclonal		WB, IF	1:1000, 1:100
	LMNA	proteintech	Rabbit	10298-1-AP	Polyclonal		WB, IF	1:1000, 1:100
	SLC2A3	abmart	Rabbit	T56896	Monoclonal		WB	1:1000
	ARL4C	proteintech	Rabbit	10202-1-AP	Polyclonal		WB, IF	1:1000, 1:100
	TIMP1	proteintech	Rabbit	16644-1-AP	Polyclonal		WB, IF	1:1000, 1:100
	β-actin	Servicebio	Mouse	GB15001-100	10B6H8		WB	1:2000
	Vinclin	Servicebio	Mouse	GB120003-100	5H9A3		WB	1:1000
	SLC2A3	abcam	Rabbit	ab234756	Polyclonal		IF	1:100
Secondary antibodies
	Goat Anti-Mouse IgG	Abbkine	Goat	A21010			WB	1:5000
	Goat Anti-Rabbit IgG	Abbkine	Goat	A21020			WB	1:5000
	Goat anti-rabbit IgG (H+L) (Alexa 594)	ThermoFisher	Goat	A-11012			IF	1:200
	Goat anti-mouse IgG (H+L) (Alexa 594)	ThermoFisher	Goat	A-11005			IF	1:200
	Goat anti-rabbit IgG (H+L) (Alexa 488)	ThermoFisher	Goat	A-11008			IF
	Goat anti-mouse IgG (H+L) (Alexa 488)	ThermoFisher	Goat	A-11001			IF
