# Supplementary material
Source: Research Square preprint supplement (doi:10.21203/rs.3.rs-8910521/v1)
Supplement: Supplementary file 2 [file a5b294aa7ddef1b69554e814.xlsx]

## Sheet: Sheet1
Supplementary Table 1: The sequences of RT-qPCR primers used in the study.
	Target	Forward (5' to 3')	Reverse (5' to 3')
	KLF3	TGTCTCAGTGTCATACCCATCT	CCTTCTGGGGTCTGAAAGAACTT
	LMNA	TGAGAGGAACAGCAACCTGG	GTGTTCTGTGCCTTCCACAC
	SLC2A3	GCTGGGCATCGTTGTTGGA	GCACTTTGTAGGATAGCAGGAAG
	ARL4C	GGGCAACATCTCCTCTAACAT	GTTGAACTTGAGCCGGTAGA
	TIMP1	TCTGGCATCCTCTTGTTGCTAT	CCACAGCGTCGAATCCTT
